# Supplementary material for: High-throughput optofluidic platforms for mosaicked microfibers toward multiplex analysis of biomolecules
Source: Royal Society of Chemistry journal article supplement (doi:10.1039/c2lc40439g), 2012-01-01
Supplement: c2lc40439g.pdf [file c2lc40439g.pdf]

## Electronic Supplementary Information (ESI)

# High-Throughput Optofluidic Platforms for Mosaicked Microfibers toward Multiplex Analysis of Biomolecules

Soojeong Cho, § Tae Soup Shim§ and Seung-Man Yang\*

## S1. Experimental

**Preparation of Fluorescent Dye Modified Silica Particles:** Sol-gel based Stöber method was used to prepare monodisperse silica particles with the size of 330 nm. Fluorescent dye solutions were prepared by mixing fluorescent dye molecules with aminopropyl-trimethoxysilane (APMS, Aldrich); tetramethyl rhodamine isothiocyanate (TRITC, Sigma-Aldrich), fluorescein isothiocyanate (FITC, TCI) and coumarin 343 (Sigma-Aldrich) were used. Then three dye solutions were added into 1% (w/w) ethanolic suspension of silica particles with tetraethyl orthosilicate (TEOS, Aldrich) and ammonium hydroxide (Sigma-Aldrich), respectively. This sol-gel reaction proceeded for 48 h. Further reaction with additional TEOS for 12 h led to formation of silica thin shells on bare dye tagged silica particles.

**Acrylation of Immunoglobulin G:** Human IgG (reagent grade, ≥95%, buffered aqueous solution, Sigma-Aldrich) and rabbit IgG (technical grade, ≥80%, buffered aqueous solution, Sigma-Aldrich) were acrylated by reacting with 5000 Da acrylate-PEG-NHS (Jenkem technology) at 1:1 molar ratio in 50 mM sodium bicarbonate buffer of pH 8. The reaction was run for 3 h at room temperature under continuous stirring. Dialysis were proceeded to remove unreacted acryl-PEG-NHS against deionized water using 5000 MWCO cellulose dialysis membrane (Spectra/por)

**Preparation of solutions for mosaicked microfibers with fluorescence:** A solution for core fluid was prepared in proportion of 95% (v/v) of poly(ethylene glycol)(575) diacrylate (PEGDA, Sigma-

Aldrich), 5% (w/w) of Darocur 1173 (Ciba Specialty Chemicals) and 0.5% (v/v) of fluorescent dye modified silica particles. Pure poly(ethylene glycol)(400) (PEG, USB Corporation) was used as carrier fluids.

**Preparation of solutions for biomolecular analysis:** The core fluid was formulated with 50% (v/v) of PEGDA, 5% (v/v) of Darocur 1173 and 0.1% (w/v) of IgG in 0.01 M phosphate buffered saline, (pH 7.4) (PBS, Sigma Aldrich). The solution of carrier fluid was prepared with 50% (v/v) of PEG in PBS.

**Fabrication of microfluidic devices:** Firstly, photomasks for microchannels were designed with AutoCAD. Then, conventional photolithography was conducted by using SU-8 photoresist (Microchem) to make channel patterns for both top and bottom layers. Subsequently, 10:1 mixture of polydimethylsiloxane (PDMS, Sylgard 184, Dow Corning) and base curing agent was poured over SU-8 microchannel patterns and cured in convection oven at 70 °C for 2 h. Finally, PDMS molds for top and bottom layers were detached from substrates and then, carefully combined after the oxygen plasma treatment.

**Generation of microfibers in microfluidic devices:** The microfluidic device was mounted on an inverted optical microscope (Eclipse TE 2000-U, Nikon). Then, each fluid was introduced to microchannels with various volumetric flow rates using syringe pumps (KDS 200, KD Scientific). After stabilizing the flow for a several minute, UV light was irradiated through a lens using super high pressure mercury lamp (100 W, C-SHG1, Nikon). A core flow was photopolymerized with the desired microfiber composition. Finally, a polymeric microfiber was collected at the outlet of microfluidic device.

**Detection of target biomolecules using mosaic-patterned microfibers:** Three sample solutions were prepared. Each solution was formulated with 20 µg/ml of anti-immunoglobulin G (anti-IgG) in

PBS buffer. Two types of anti-IgG, FITC-anti-human IgG (Sigma-Aldrich) and TRITC-anti-rabbit IgG (Sigma-Aldrich) were used. Microfibers were incubated with these three solutions for 30 min at 35 °C and washed with DI water for several times. A confocal laser scanning microscope (LSM 5 PASCAL, Zeiss) was used to detect fluorescent signals from target molecules and it processed images for Top, cross-sectional and bottom views.

## S2. Manipulation of microfiber dimensions.

| Fractional volume of core liquid ( $\phi_{core}$ ) | Flow rate ( $\mu\text{l/hr}$ ) |      |         |
|----------------------------------------------------|--------------------------------|------|---------|
|                                                    | Total                          | Core | Carrier |
| 0.4                                                | 200                            | 80   | 60      |
| 0.5                                                | 200                            | 100  | 50      |
| 0.6                                                | 200                            | 120  | 40      |
| 0.7                                                | 200                            | 140  | 30      |
| 0.8                                                | 200                            | 160  | 20      |

**Table S1.** Flow rates of core and carrier liquid flows corresponding to the fractional volumes of core liquid flows ( $\phi_{core}$ ).

### S3. Composition change of microfibers.

| $\phi_{red,flow}$ | Flow rate ( $\mu\text{l/hr}$ ) |         |          |            |
|-------------------|--------------------------------|---------|----------|------------|
|                   | Total                          | Carrier | Red core | Green core |
| 0.1               | 500                            | 100     | 40       | 360        |
| 0.3               | 500                            | 100     | 120      | 280        |
| 0.5               | 500                            | 100     | 200      | 200        |
| 0.7               | 500                            | 100     | 280      | 120        |
| 0.9               | 500                            | 100     | 360      | 40         |

**Table S2.** Fractional volumes of red fluorescent flow,  $\phi_{red,flow}$ , and flow rates of red and green cores, and carrier liquid flows,.

#### S4. Formation of stratified laminar flows

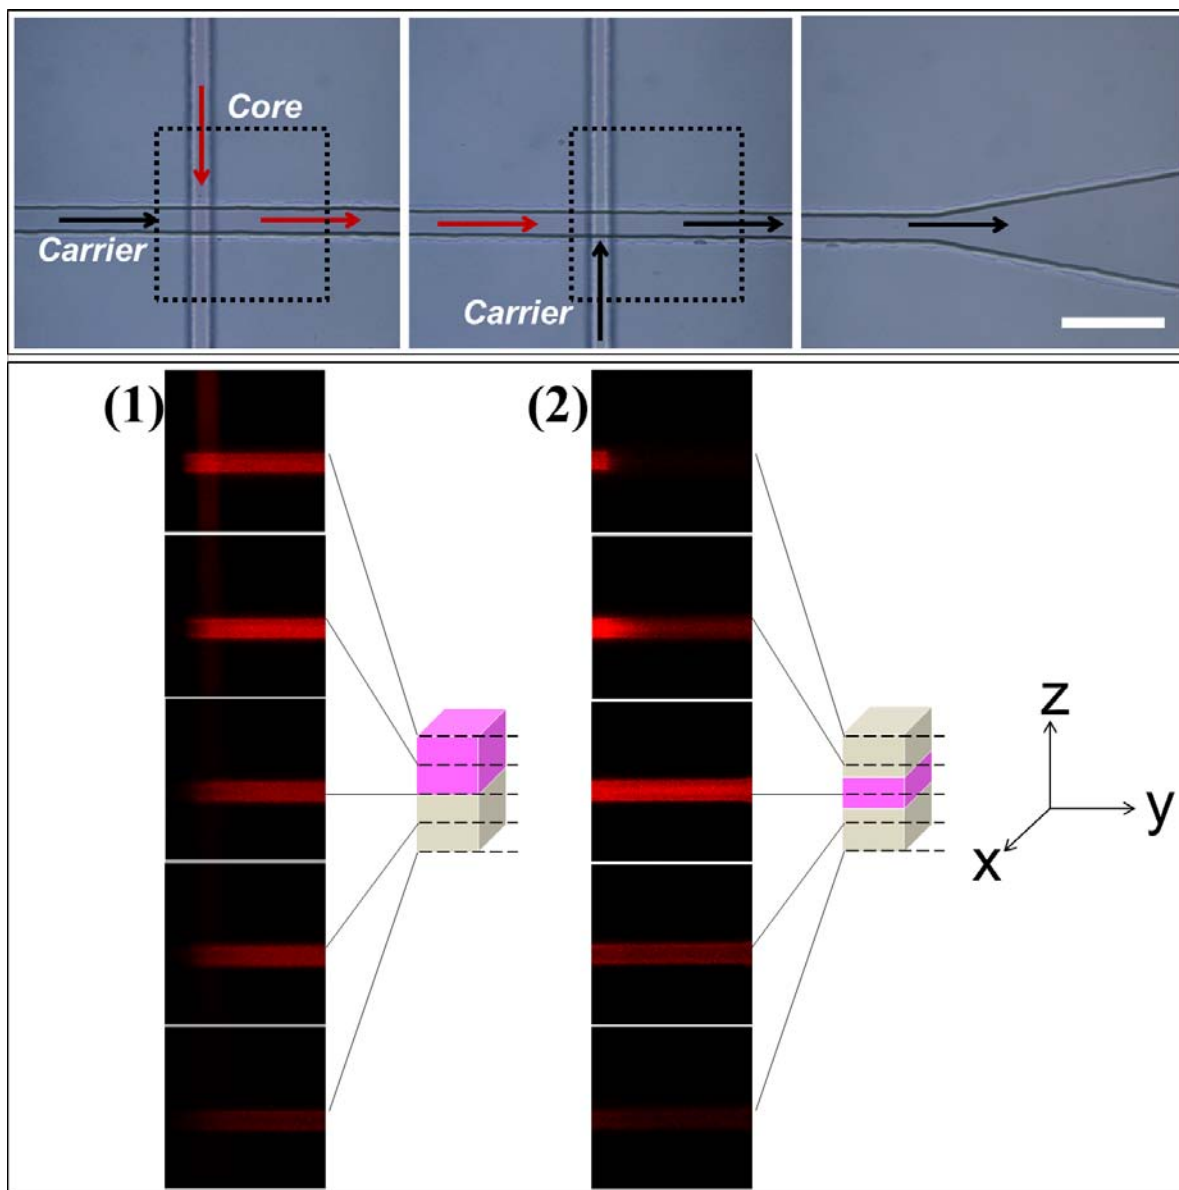

**Fig. S1** Gallery of confocal microscope images obtained from cross junctions. Each cross junction was scanned in z-direction and visualized with red fluorescent dyes in a core flow. Formation of bilayer and trilayer laminar flows is represented. Scale bar for (A) is 200  $\mu\text{m}$ .

## S5. High-throughput generation of microfibers

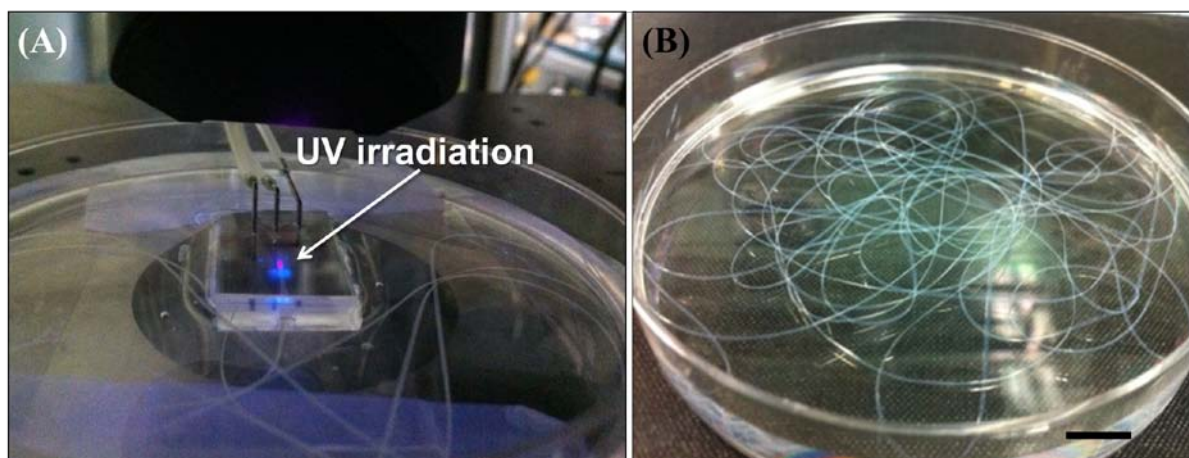

**Fig. S2** Continuous generation of a microfiber in a microfluidic device (A) Digital camera image of the microfluidic device over UV irradiation. (B) A meter-long microfiber immersed in water. Approximately 3 m of microfiber was generated for more than a hour-long UV exposure. Scale bar is 1 cm for (B).

### S6. SEM images of microfiber with different dimensions

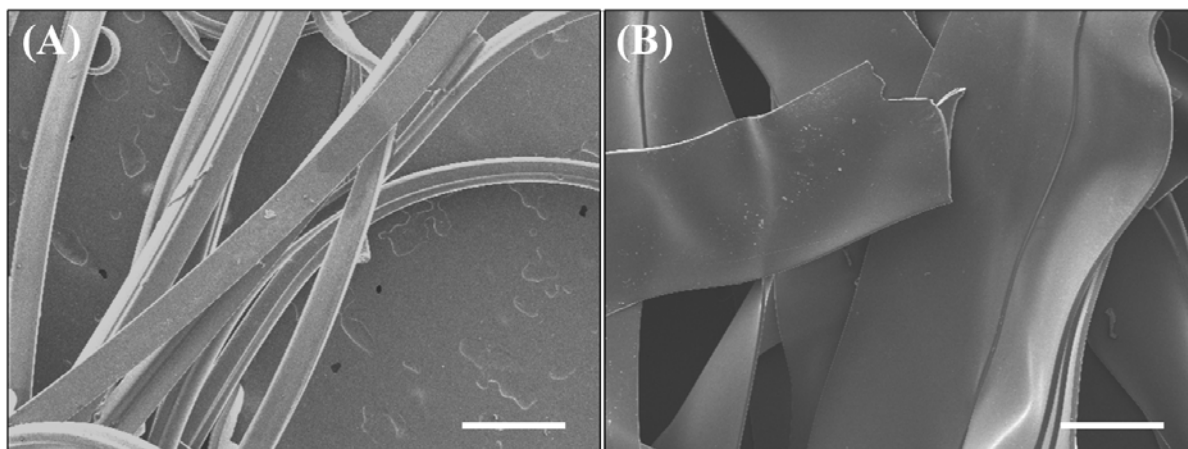

**Fig. S3 Width tuning of microfibers by using different microchannels.** (A) The SEM image of microfibers fabricated in microchannel of 200  $\mu\text{m}$  and (B) microfibers fabricated in microchannel of 1000  $\mu\text{m}$ . All scale bars are 500  $\mu\text{m}$ .



## S7. Uniform thickness of microfibers

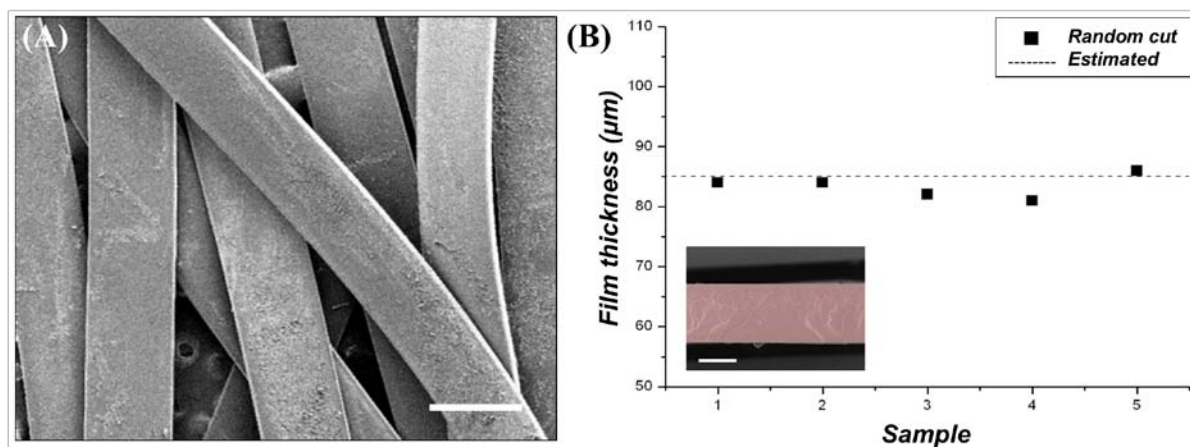

**Fig. S4 The uniformity of a microfiber** (A) The SEM image of a microfiber with the uniform width. (B) Random cuts of five pieces were collected and thickness was measured. The calculated microfiber thickness was 85  $\mu\text{m}$  and the average of measured thickness was 83.4  $\mu\text{m}$  with standard deviation of 1.95, which confirmed the uniformity of microfiber thickness. Scale bars are 500  $\mu\text{m}$  for (A) and 50  $\mu\text{m}$  for (B).

### S8. Sensitivity of microfiber for biomolecular analysis

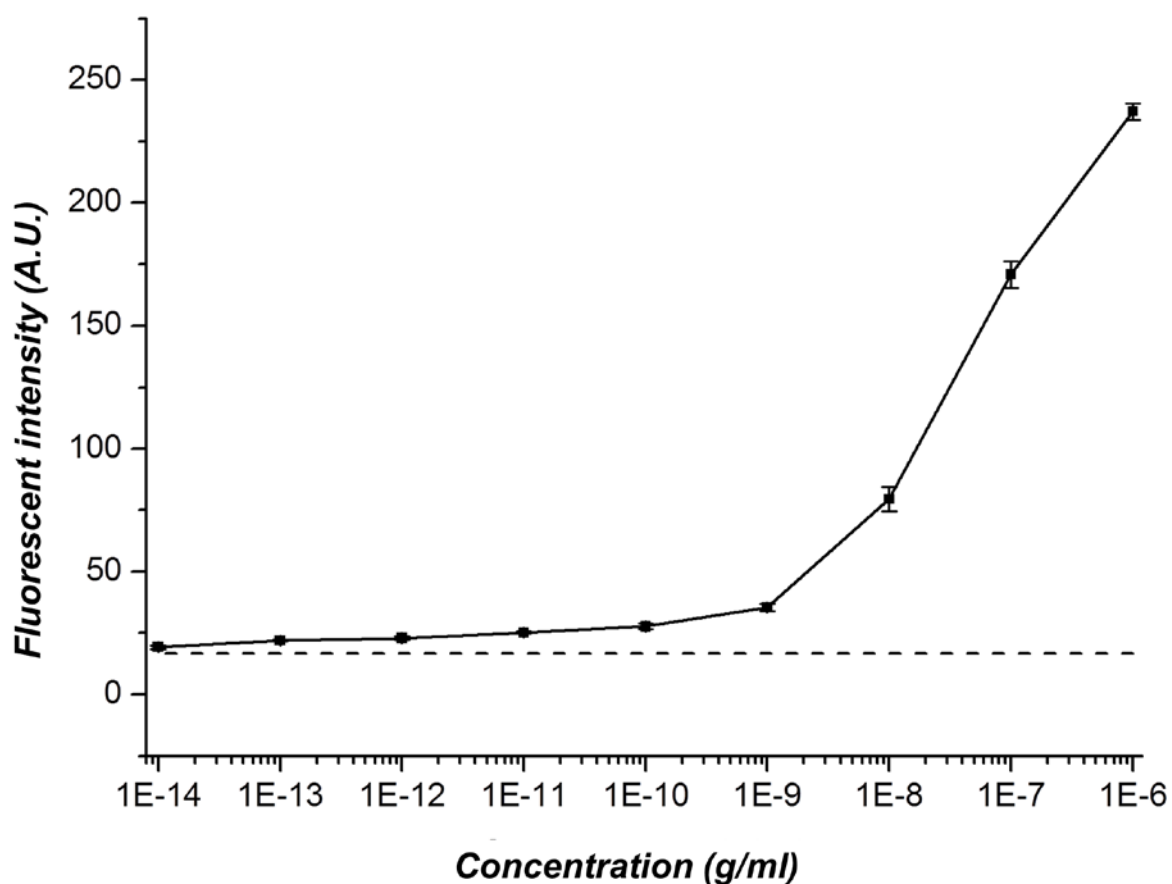

**Fig. S5 Detection sensitivity of hydrogel microfiber for biomolecular analysis.** Fluorescent intensity was measured corresponding to the concentration of FITC-anti human IgG. The distinguishable fluorescent signal of the hydrogel microfiber was as low as 0.01 pg/ml. The dotted line refers to fluorescent signal from the microfiber without treatment of FITC-anti human IgG.
